# Supplementary material
Source: PubMed Central journal article supplement (PMC3457427)
Supplement: JCM.00976-12_zjm999091929so1.pdf [file JCM.00976-12_zjm999091929so1.pdf]

|        |             |        |        |     |
|--------|-------------|--------|--------|-----|
| 09_47  | [Bar chart] | [Grid] | [Grid] | MDR |
| 09_53  | [Bar chart] | [Grid] | [Grid] | MDR |
| 09_54  | [Bar chart] | [Grid] | [Grid] | MDR |
| 09_58  | [Bar chart] | [Grid] | [Grid] | MDR |
| 10_2   | [Bar chart] | [Grid] | [Grid] | MDR |
| 10_29  | [Bar chart] | [Grid] | [Grid] | MDR |
| 10_30  | [Bar chart] | [Grid] | [Grid] | MDR |
| 10_32  | [Bar chart] | [Grid] | [Grid] | MDR |
| 10_33  | [Bar chart] | [Grid] | [Grid] | MDR |
| 10_43  | [Bar chart] | [Grid] | [Grid] | MDR |
| 10_46  | [Bar chart] | [Grid] | [Grid] | MDR |
| 10_47  | [Bar chart] | [Grid] | [Grid] | MDR |
| 10_51  | [Bar chart] | [Grid] | [Grid] | MDR |
| 10_59  | [Bar chart] | [Grid] | [Grid] | MDR |
| 10_71  | [Bar chart] | [Grid] | [Grid] | MDR |
| 10_81  | [Bar chart] | [Grid] | [Grid] | MDR |
| 10_88  | [Bar chart] | [Grid] | [Grid] | MDR |
| 10_99  | [Bar chart] | [Grid] | [Grid] | MDR |
| 10_103 | [Bar chart] | [Grid] | [Grid] | MDR |
| 10_104 | [Bar chart] | [Grid] | [Grid] | MDR |
| 10_105 | [Bar chart] | [Grid] | [Grid] | MDR |
| 1      | [Bar chart] | [Grid] | [Grid] | MDR |
| 2      | [Bar chart] | [Grid] | [Grid] | MDR |
| 3      | [Bar chart] | [Grid] | [Grid] | MDR |
| 4      | [Bar chart] | [Grid] | [Grid] | MDR |
| NG004  | [Bar chart] | [Grid] | [Grid] | S   |
| NG026  | [Bar chart] | [Grid] | [Grid] | S   |
| NG068  | [Bar chart] | [Grid] | [Grid] | S   |
| NG154  | [Bar chart] | [Grid] | [Grid] | S   |
| NG205  | [Bar chart] | [Grid] | [Grid] | S   |
| NG166  | [Bar chart] | [Grid] | [Grid] | S   |
| NG023  | [Bar chart] | [Grid] | [Grid] | S   |
| NG079  | [Bar chart] | [Grid] | [Grid] | S   |
| NG095  | [Bar chart] | [Grid] | [Grid] | S   |
| NG353  | [Bar chart] | [Grid] | [Grid] | S   |
| NG457  | [Bar chart] | [Grid] | [Grid] | S   |
| NG517  | [Bar chart] | [Grid] | [Grid] | S   |
| NG523  | [Bar chart] | [Grid] | [Grid] | S   |
